# Supplementary material for: The Effect of Motivational Determinants on Elite Wrestlers’ Intentions to Continue in Sport: The Mediating Role of Enjoyment
Source: Research Square preprint supplement (doi:10.21203/rs.3.rs-8001495/v1), 2025-11-18
Supplement: Supplementary file 1 [file a7de5e401c292260835bcd22.docx]

| **A. Draft Interview Form**  *In the initial stage of the research, a draft interview form consisting of 15 questions related to the psychological processes influencing the intention to continue in sport was developed. Following a content validity evaluation by three field experts, this draft was reduced to six core questions. The six-question draft interview form is presented below.* |
| --- |
| - 1. What are your general thoughts and opinions about wrestling as a sport?   2. What were your reasons for starting wrestling?   3. What are the positive or negative processes that influence your decision to continue wrestling?   4. How do you feel while wrestling? What are the positive and negative emotions and feelings you experience?   5. What are your future expectations or goals in this sport? What are the obstacles to achieving these expectations and goals?   6. What are your thoughts and opinions about the effects of wrestling on your life? What would you recommend to those who are new to this sport? |
| ***B. Final Semi-Structured Interview Form***  *After expert feedback and pilot interviews, the wording and sequence of the questions were refined. The final version of the interview form consists of the following core question and its associated follow-up (probe) questions.* |
| **Core Question**  What are the views of elite wrestlers on the factors influencing their intention to continue in sport? |
| **Probing Questions**   1. What are the factors that influence your intention to continue participating in sports? 2. What are the most significant factors that affect your decision to remain in sports? 3. Could you describe the situations, experiences, or processes that have positively or negatively affected this decision? |

**Supplementary File 1.** Draft and Final Semi-Structured Interview Forms
